# Supplementary material for: Spectral Data Collection by Dual Field-of-View System under Changing Atmospheric Conditions—A Case Study of Estimating Early Season Soybean Populations
Source: Sensors (Basel). 2019 Jan 23;19(3):457. doi: 10.3390/s19030457 (PMC6386976; doi:10.3390/s19030457)
Supplement: Supplementary file 1 [file sensors-19-00457-s001.zip › Sup1_PLSR_Table.xlsx]

## Sheet: Sheet1
Datecal	Dateval	Till	row spacing (cm)	Development stage	R2cal	R2cross-val	RMSEcal*104	RMSEcross-val*104	# samplescal	Latent variables	Two wavelengths (nm) producing top absolute PLS coefficients value	R2val	RMSEval*104	# samplesval
Calibration based on replicate 2 and validated for replicate 1
2016-07-27	2016-06-17	NT	38	VC	0.84	0.79	5.0662	6.1899	28	2	900 720	0.52	11.7726	28
2016-08-01	2016-06-21	NT	38	V1	0.82	0.75	5.4376	6.912	28	2	725 780	0.44	10.4141	28
2016-08-04	2016-06-27	NT	38	V2	0.84	0.83	5.0203	5.5929	28	1	550 860	0.7	10.4871	28
2016-08-08	2016-06-29	NT	38	V3	0.91	0.87	3.6697	4.9805	28	3	765 725	0.78	8.964	28
2016-07-27	2016-06-17	NT	76	VC	0.78	0.73	5.7151	6.6034	28	1	855 540	0.57	13.7586	28
2016-08-01	2016-06-21	NT	76	V1	0.74	0.71	6.2034	6.9477	28	1	550 785	0.61	11.0299	28
2016-08-04	2016-06-27	NT	76	V2	0.86	0.8	4.4929	5.9241	28	2	725 885	0.78	9.821	28
2016-08-08	2016-06-29	NT	76	V3	0.87	0.79	4.3962	6.1778	28	2	900 400	0.67	9.6491	28
2016-07-27	2016-06-17	CT	38	VC	0.33	0.25	8.6949	9.7726	21	1	805 555	0.35	9.656	28
2016-08-01	2016-06-21	CT	38	V1	0.79	0.64	4.701	7.4503	21	2	725 895	0.66	8.3853	28
2016-08-04	2016-06-27	CT	38	V2	0.66	0.54	6.189	8.094	21	2	900 825	0.73	12.2412	28
2016-08-08	2016-06-29	CT	38	V3	0.78	0.65	4.8502	7.4701	21	2	725 890	0.85	5.3648	28
2016-07-27	2016-06-17	CT	76	VC	0.87	0.86	4.6705	5.4808	28	1	830 530	0.44	12.3635	28
2016-08-01	2016-06-21	CT	76	V1	0.98	0.92	1.6813	4.6332	28	6	895 880	0.66	8.5788	28
2016-08-04	2016-06-27	CT	76	V2	0.97	0.92	2.256	4.1446	28	4	895 830	0.73	8.5603	28
2016-08-08	2016-06-29	CT	76	V3	0.89	0.83	4.4644	5.9907	28	2	725 900	0.79	5.3946	28
Calibration based on replicate 1 and validated for replicate 2
2016-06-17	2016-07-27	NT	38	VC	0.8	0.75	5.7547	6.9534	28	2	870 720	0.8	17.2663	28
2016-06-21	2016-08-01	NT	38	V1	0.84	0.76	5.1343	6.8032	28	3	550 720	0.8	8.0223	28
2016-06-27	2016-08-04	NT	38	V2	0.69	0.66	7.3267	7.8442	28	1	850 555	0.85	9.206	28
2016-06-29	2016-08-08	NT	38	V3	0.87	0.8	4.6104	6.423	28	2	725 900	0.8	6.9411	28
2016-06-17	2016-07-27	NT	76	VC	0.86	0.78	5.413	7.6274	28	2	900 725	0.25	23.205	28
2016-06-21	2016-08-01	NT	76	V1	0.84	0.78	5.9267	7.6082	28	2	725 900	0.1	18.9043	28
2016-06-27	2016-08-04	NT	76	V2	0.81	0.74	6.3093	8.4588	28	2	725 900	0.84	11.9701	28
2016-06-29	2016-08-08	NT	76	V3	0.81	0.73	6.4235	8.4396	28	2	900 725	0.85	7.6598	28
2016-06-17	2016-07-27	CT	38	VC	0.64	0.49	6.5924	8.6063	28	2	895 725	0.39	10.3662	21
2016-06-21	2016-08-01	CT	38	V1	0.87	0.77	3.9925	5.8861	28	3	855 885	0.33	11.1647	21
2016-06-27	2016-08-04	CT	38	V2	0.8	0.74	4.996	6.2134	28	2	890 720	0.31	9.5478	21
2016-06-29	2016-08-08	CT	38	V3	0.89	0.81	3.5914	5.4136	28	3	725 895	0.74	5.7726	21
2016-06-17	2016-07-27	CT	76	VC	0.62	0.5	6.8604	8.6632	28	2	725 880	0.74	9.836	28
2016-06-21	2016-08-01	CT	76	V1	0.82	0.77	4.6748	5.8939	28	2	725 860	0.87	18.5637	28
2016-06-27	2016-08-04	CT	76	V2	0.95	0.9	2.3633	4.1961	28	5	885 835	0.93	4.1831	28
2016-06-29	2016-08-08	CT	76	V3	0.86	0.8	4.1554	5.4793	28	2	730 900	0.79	6.6173	28
All treatments per development stage
				VC	0.6	0.49	8.3	97	161	9	890 850	0.51	103.7	56
				V1	0.76	0.64	6.7	84.1	161	6	881 820	0.63	76.8	56
				V2	0.78	0.7	60.7	73.5	161	7	865 835	0.69	83.2	56
				V3	0.84	0.77	53.2	66.5	161	9	860 815	0.68	76.3	56
				all	0.69	0.61	74.7	85.3	644	20	795 520	0.65	78.7	224
