# Supplementary material for: Spectral Data Collection by Dual Field-of-View System under Changing Atmospheric Conditions—A Case Study of Estimating Early Season Soybean Populations
Source: Sensors (Basel). 2019 Jan 23;19(3):457. doi: 10.3390/s19030457 (PMC6386976; doi:10.3390/s19030457)
Supplement: Supplementary file 1 [file sensors-19-00457-s001.zip › Sup2_NDSI_Table.xlsx]

## Sheet: Sheet1
Bold stands for sunny days
Datecal	Dateval	Till	row spacing (cm)	Development stage	R2cal	RMSEcal*104	# samplescal	R2val	RMSEval*104	# samplesval
Calibration based on replicate 2 and validated for replicate 1
2016-07-27	2016-06-17	NT	38	VC	0.55	9.2042	28	0.73	7.2079	28
2016-08-01	2016-06-21	NT	38	V1	0.68	7.7417	28	0.79	6.2403	28
2016-08-04	2016-06-27	NT	38	V2	0.72	7.179	28	0.69	7.7796	28
2016-08-08	2016-06-29	NT	38	V3	0.84	5.3993	28	0.83	5.7603	28
2016-07-27	2016-06-17	NT	76	VC	0.34	10.6472	28	0.52	10.8793	28
2016-08-01	2016-06-21	NT	76	V1	0.66	7.5819	28	0.44	11.7151	28
2016-08-04	2016-06-27	NT	76	V2	0.78	6.1076	28	0.61	9.8196	28
2016-08-08	2016-06-29	NT	76	V3	0.74	6.7465	28	0.53	10.746	28
2016-07-27	2016-06-17	CT	38	VC	0.32	9.6281	21	0.38	9.5227	28
2016-08-01	2016-06-21	CT	38	V1	0.44	8.7508	21	0.64	7.1047	28
2016-08-04	2016-06-27	CT	38	V2	0.56	7.7644	21	0.73	6.1783	28
2016-08-08	2016-06-29	CT	38	V3	0.43	8.8499	21	0.65	7.0103	28
2016-07-27	2016-06-17	CT	76	VC	0.68	8.0218	28	0.64	7.3693	28
2016-08-01	2016-06-21	CT	76	V1	0.78	6.6511	28	0.69	6.7243	28
2016-08-04	2016-06-27	CT	76	V2	0.88	4.9354	28	0.83	5.0191	28
2016-08-08	2016-06-29	CT	76	V3	0.76	6.9337	28	0.59	7.723	28
Calibration based on replicate 1 and validated for replicate 2
2016-06-17	2016-07-27	NT	38	VC	0.73	7.2079	28	0.55	9.2042	28
2016-06-21	2016-08-01	NT	38	V1	0.79	6.2402	28	0.68	7.7417	28
2016-06-27	2016-08-04	NT	38	V2	0.69	7.7796	28	0.72	7.1791	28
2016-06-29	2016-08-08	NT	38	V3	0.83	5.7603	28	0.84	5.3992	28
2016-06-17	2016-07-27	NT	76	VC	0.52	10.8793	28	0.34	10.6472	28
2016-06-21	2016-08-01	NT	76	V1	0.44	11.7151	28	0.66	7.5819	28
2016-06-27	2016-08-04	NT	76	V2	0.61	9.8196	28	0.78	6.1076	28
2016-06-29	2016-08-08	NT	76	V3	0.53	10.746	28	0.74	6.7465	28
2016-06-17	2016-07-27	CT	38	VC	0.38	9.5227	28	0.32	9.6281	21
2016-06-21	2016-08-01	CT	38	V1	0.64	7.1047	28	0.44	8.7508	21
2016-06-27	2016-08-04	CT	38	V2	0.73	6.1783	28	0.56	7.7644	21
2016-06-29	2016-08-08	CT	38	V3	0.65	7.0103	28	0.43	8.8499	21
2016-06-17	2016-07-27	CT	76	VC	0.64	7.3693	28	0.68	8.0218	28
2016-06-21	2016-08-01	CT	76	V1	0.69	6.7243	28	0.78	6.6511	28
2016-06-27	2016-08-04	CT	76	V2	0.83	5.0191	28	0.88	4.9354	28
2016-06-29	2016-08-08	CT	76	V3	0.59	7.723	28	0.76	6.9337	28
All treatments per development stage
				VC	0.32	10.9864	161	0.34	11.4433	56
				V1	0.47	10.0959	161	0.39	10.0285	56
				V2	0.6	8.39629	161	0.58	9.15025	56
				V3	0.59	8.7475	161	0.47	9.55496	56
Seven plots in the second replicate of the CT study with plant populations ranging from 37,000-259,000 plants ha-1 were not included in the analysis due to an error in performing final plant population counts.
